# Supplementary material for: Mitochondrial dysfunction following repeated administration of alprazolam causes attenuation of hippocampus-dependent memory consolidation in mice
Source: publisher site journal article supplement (doi:10.18632/aging.205087), 2023-10-05
Supplement: Supplementary file [file aging-v15i19-205087-supplementary-material-SD3.pdf]

## SUPPLEMENTARY TABLE

**Supplementary Table 1. Sleep phase of two group of mice (n=6).**

| <b>Group</b> | <b>Waking (%)</b> | <b>SWS (%)</b> | <b>REMS (%)</b> |
|--------------|-------------------|----------------|-----------------|
| Control      | 93.3±1.5          | 5.2±1.1        | 1.3±0.9         |
| Alp          | 78.8±3.7*         | 15.7±3.3*      | 4.2±1.5*        |

\* $p < 0.05$  vs. control, Data are presented as mean ± SEM.
